# Supplementary material
Source: Springer Nature journal article supplement (https://www.springermedizin.de/resource/supplementary/13054_2011_552_MOESM3_ESM.pdf/9708758)

| Study                           | Restrictive |            | Routine    |            | Weight        | Risk Ratio<br>[95% CI]   |
|---------------------------------|-------------|------------|------------|------------|---------------|--------------------------|
|                                 | Events      | Total      | Events     | Total      |               |                          |
| <b>Primary analysis: Trials</b> |             |            |            |            |               |                          |
| Clec'h et al, 2008              | 27          | 81         | 27         | 84         | 22.3%         | 1.04 [0.67, 1.61]        |
| Hejblum et al, 2009             | 98          | 306        | 94         | 305        | 77.7%         | 1.04 [0.82, 1.31]        |
| <b>Patients</b>                 | <b>125</b>  | <b>387</b> | <b>121</b> | <b>389</b> | <b>100.0%</b> | <b>1.04 [0.84, 1.28]</b> |

**Overall effect:  $p=0.72$ ; heterogeneity:  $I^2=0\%$**

**Sensitivity Analysis: Trials and observational studies**

|                     |            |             |            |             |               |                          |
|---------------------|------------|-------------|------------|-------------|---------------|--------------------------|
| Graat et al, 2007   | 62         | 622         | 94         | 754         | 31.8%         | 0.80 [0.59, 1.08]        |
| Clec'h et al, 2008  | 27         | 81          | 27         | 84          | 15.2%         | 1.04 [0.67, 1.61]        |
| Hejblum et al, 2009 | 98         | 306         | 94         | 305         | 53.0%         | 1.04 [0.82, 1.31]        |
| <b>Patients</b>     | <b>187</b> | <b>1009</b> | <b>215</b> | <b>1143</b> | <b>100.0%</b> | <b>0.96 [0.81, 1.13]</b> |

**Overall effect:  $p=0.60$ ; heterogeneity:  $I^2=0\%$**

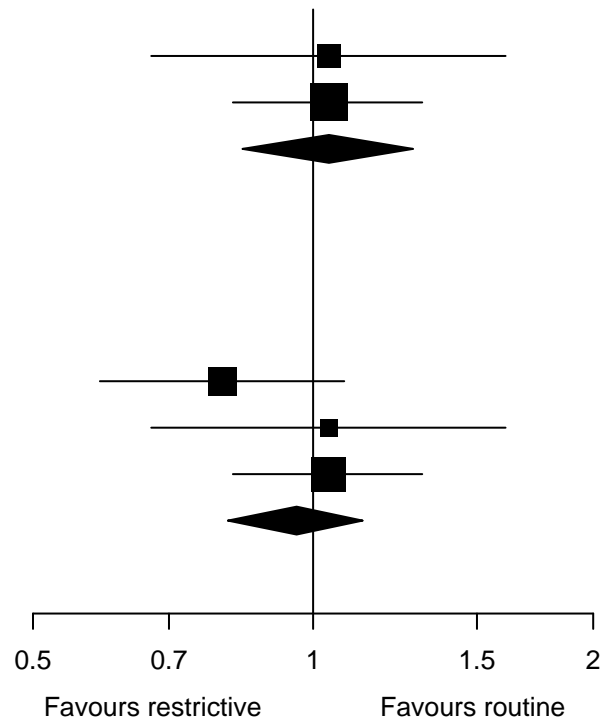

Supplement: MOESM3 [file 9708758]
